# Supplementary material
Source: publisher site journal article supplement (https://www.dovepress.com/article/155750)
Supplement: Supplementary file 1 [file get_supplementary_file.php]

**LIST OF IECS OR IRBS AND REPRESENTATIVE WRITTEN**

**INFORMATION FOR PATIENT AND SAMPLE CONSENT**

**FORMS**

**Name/Address of IEC/IRB**

Sydney South West Area

Health Service

Human Research Ethics

Committee – Level 1, Building

75

Concord Repatriation General

Hospital

Concord NSW 2139 Australia

Bellberry Limitted

229 Greenhill Road

Dulwich, South Australia 5065

OCREB Submission

Ontario Cancer Research

Ethics Board

MaRs Centre, South Tower

101 College Street, Suite 800

Toronto, ON M5G 0A3

Canada

Frasier Health Research Ethics

Board

300-10334 152A

Surrey, B.C., V3R 7P8

Canada

William Osler Health Centre,

Research Ethics Board

William Osler Health Centre,

Brampton Civic Hospital

Campus

2100 Bovaird Drive

Brampton, ON L6R 3J7

Comit’e d’ethique de la

recherché

Hopital du Sacr’e-Coeur de

Montreal

5400 ouest, boul. Gouin

Montreal, QC H4J 1C5

McGill Faculty of Medicine –

IRB

McIntyre Medical Sciences

Building

3655 Promenade Sir William

Osler, #637

Montreal, Quebec H3G 1Y6

Canada

McGill University Dept. of

Oncology

Clinical Research Program

546 Pine Avenue West

Montreal, Quebec H2W 1S6

University Health Network

Research Ethics Board

700 University Avenue, 8th

floor South, Rm 8-19

Toronto, Ontario M5G 1Z5

Nippon Medical School

Hospital IRB

1-1-5 Sendagi Bunkyo

Tokyo, Japan 113-8603

National Kyushu Cancer

Center IRB

Dept. of Thoracic Oncology

3-1-1 Notame, Minami-ki

Fukuoka, Japan 811-1395

KKR Sapporo Medical Center

IRB

3-40, Hiragishi 1-6, Toyohiraku

Sapporo-shi, Japan 062-0931

Kanazawa University Hospital

IRB

1-13 Takara-machi, Kanazawa

Ishikawa, Japan 920-8641

Kinki-Chuo Chest Medical

Center IRB

1180, Sone-cho, sakai-shi

Osaka-hu, Japan 591-8555

National Cancer Center

Hospital IRB

5-1-1 Tsukiji, Chuo-ku

Tokyo, Japan 104-0045

Kitasato University Hospital

IRB

1-15-1 Kitasota Sagamiharashi

Kanagawa, Japan 228-8555

Osaka Prefectural Medical

Center

for Respiratory and Allergic

Disease, IRB

Osaka Prefectural Hospital

Organization

3-7-1, Habikino, Habikino-shi

Osaka-hu, Japan 583-8588

Aichi Cancer Center Hospital

IRB

1-1 Kanokoden, Chikusaku

Nagoya, Japan 464-8681

Hyogo Cancer Center IRB

13-70, Kitaoji-cho, Akashi

City

Hyogo, Japan 673-8588

Tohoku University Hospital

IRB

1-1 Seiryo-machi, Aoba-ku,

Sendai City

Miyagi Prefecture, Japan 980-

8574

Kinki University Hospital IRB

377-2 Ohno-Higashi, Osaka-

Sayama City

Osaka Prefecture, Japan 589-

8511

Kameda General Hospital IRB

929 Higashi-cho, Kamogawa

Chiba, Japan 296-8602

Saitama Cancer Center IRB

818 Kouro, Ina-machi,

Kitaadachi-gun

Saitama, Japan 362-0806

Saitama Medical University

International Medical Center

IRB

1397-1 Yamane Hidaka-shi

Saitama, Japan 350-1298

National Hospital Organization

Shikoku Cancer Center IRB

160 Minamiumemoto-cho,

Matsuyama

Ehime, Japan 791-0288

Osaka City General Hospital

IRB

2-13-22, Miyakojimahondori,

Miyakjima-ku, Osaka City

Osaka, Japan 534-0021

Tokyo Medical University &

Hospital IRB

6-7-1 Nishishinjuku, Shinjukuku

Tokyo, Japan 160-0023

Shizuoka Cancer Center IRB

1007 Shimonagakubo,

Nagaizumi-cho, Sunto-gun

Shizuoka, Japan 411-8777

Kanagawa Cancer Center IRB

1-1-2 Nakao, Asashi-ku,

Yokohama

Kanagawa, Japan 241-0815

Ethics Committee within the

Federal Authority of

Healthcare and Social

Development Regulation

8/2 Petrovsky blvd.

Moscow 127051 Russia

Central Ethics Committee

within the Ministry of Health

Ukraine

5, Narodnogo Opolchennya str.

Kiev 03680 Ukraine

WIRB- Western Institutional

Review Board

3535 Seventh venue SW

Olympia, WA 98502-5010

Florida Hospital IRB

212 E. Winter Park Street

Orlando, FL 32804

St. Mary Medical Center IRB

1201 Langhorne-Newton Rd.

Langhorne, PA 19047

Saint Louis University IRB

3556 Caroline Street Room

110

St. Louis, MO 63104

East Texas Medical Center

Regional Healthcare Systems

IRB

721 Clinic Dr.

Tyler, TX 75701

Mercy Medical Center IRB

301 St. Paul Place

Baltimore, MD 21202

The Mary Imogene Bassett

Hospital IRB

The Mary Imogene Bassett

Hospital

One Atwell Road

Cooperstown, NY 13326

Mercy Hospital IRB

144 State Street

Portland ME 04101

The Mary Imogene Bassett

Hospital IRB

The Mary Imogene Bassett

Hospital

One Atwell Road

Cooperstown, NY 13326

University of North Carolina at

Chapel Hill

Office of Human Research

Ethics

Medical School Building 52

Mason Farm Road, CB 7097

Chapel Hill, NC27599-7097

MUSC Office of Research

Integrity (ORI) IRB

19 Hagood Ave, Suite 601

Charleston, SC 29425

Covenant Health System IRB

3615 19th Street

Lubbock, TX 79410

Desert Regional Medical

Center IRB

1150 North Indian Canyon

Drive

Palm Springs, CA 92262

Coast IRB, LLC

5475 Mark Dabling Blvd.,

Suite 351

Colorado Springs, CO 80918

Copernicus Group, IRB

One Triangle Drive, Suite 100

P.O. Box 110605

Research Triangle Park, NC

27709
